# Supplementary material for: Family Adjustment to Hereditary Cancer Syndromes: A Systematic Review
Source: MDPI journal article supplement (doi:10.3390/ijerph19031603), 2022-01-30
Supplement: s1 [file s1]

**Supplementary file 2: Characteristics of the included studies**

| Author, year               | Country | Design                                   | GT            | Sample size (n) | Age (yrs)   mean (SD), range | Gender   MALE - n(%):FEMALE - n(%)   | Main outcomes                                                                                                                                                                                 |
|----------------------------|---------|------------------------------------------|---------------|-----------------|------------------------------|--------------------------------------|-----------------------------------------------------------------------------------------------------------------------------------------------------------------------------------------------|
| Ashida et al., 2009        | USA     | Longitudinal cohort study                | HBOC          | 178             | 39.77(14.75), 18-83          | 75(42.1%):103(57.9%)                 | Lower perceived family cohesion associated with higher depression scores; Increase in family conflict associated with lower depression scores in families with higher levels of cancer worry. |
| Bartle-Haring et al., 2003 | USA     | Longitudinal observational (pilot) study | HBOC or HNPCC | 50:MC=25; FM=25 | MC=39.8; FM=40.8             | MC=5(20%):19(76%); FM=9(36%):14(56%) | Higher levels of differentiation of self are associated with less distress in mutation carriers and family members.                                                                           |
| den Heijer et al., 2011    | NLD     | Longitudinal observational               | HBOC          | 222             | 47.1(8.3), 29–68             | F=100%                               | Open communication within families is associated with less breast cancer specific distress and plays a mediating role between social support and distress.                                    |
| Di Prospero et al., 2001   | CAN     | Exploratory study                        | HBOC          | 24              | 52.9, 31-77                  | 2(8.3%):22(91.7%)                    | Most participants felt a little or moderately worried about cancer-risk and nine subjects considered they would benefit from a support group.                                                 |

|                          |     |                                 |       |                                                                                            |                        |                     |                                                                                                                                                                             |
|--------------------------|-----|---------------------------------|-------|--------------------------------------------------------------------------------------------|------------------------|---------------------|-----------------------------------------------------------------------------------------------------------------------------------------------------------------------------|
| Douma et al.,<br>2011    | NLD | Cross-sectional                 | FAP   | FM=129                                                                                     | FM=46.1 (11.5), 21-79  | 63 (49%):66 (51%)   | 30% of partners reported moderate to severe levels of distress; Partners 'distress' significantly associated with carriers'.                                                |
| Eliezer et al.,<br>2014  | USA | Longitudinal observational      | HNPCC | 179 (26 families)                                                                          | 39, 18-72              | 75(42%):104(58%)    | A higher proportion of carriers in the family predicted a higher probability of participants presenting clinical levels of depression                                       |
| Hamann et al.,<br>2008   | USA | Experimental                    | HBOC  | 98 (49 dyads:16 with positive results, 13 with negative results and 20 with mixed results) | TotalMean=47.72(12.99) | 23(23.5%):75(76.5%) | Dyads with mixed results (one positive, one negative) reported less friendly support behaviour and a higher increase in anger than dyads with positive or negative results. |
| Katapodi et al.,<br>2011 | USA | Descriptive,<br>Cross-sectional | HBOC  | 372 (MC= 200; FM=172)                                                                      | 51(11), 22-83          | F=100%              | Probands showed higher risk perception and more distress than their relatives; Relatives showed higher perception of severity and controllability.                          |
| Koehly et al.,<br>2008   | USA | Cross-sectional                 | HBOC  | 65 (31 families)                                                                           | 40.7(8.6)              | F=100%              | Significant within family correlation of perceived risk, cancer worry, anxiety and somatization irrespective of mutation status.                                            |

|                                   |     |                               |      |                         |                                                  |                                          |                                                                                                                                                                                                                                         |
|-----------------------------------|-----|-------------------------------|------|-------------------------|--------------------------------------------------|------------------------------------------|-----------------------------------------------------------------------------------------------------------------------------------------------------------------------------------------------------------------------------------------|
| Lodder et al.,<br>2001            | NLD | Longitudinal<br>observational | HBOC | 154 (MC=78<br>FM=56)    | MC=38.4; FM=38.7                                 | F=100%                                   | Higher levels of anxiety were found in 20% of carriers and 35% of partners. Levels of anxiety best predicted by pretest level of anxiety.                                                                                               |
| Manne et al.,<br>2004             | USA | Longitudinal<br>observational | HBOC | 464 (MC=212;<br>FM=252) | MC=50(10.76), 27-75;<br>FM=54, 29-79             | MC_F=100%;<br>FM=117(99.2%):1(0.8%)      | Less partner support and more protective buffering from partner before test predicted more distress from carriers 6 months after results; Partners who felt understood by applicants at baseline reported less distress 6 months after. |
| Mauer et al.,<br>2015             | USA | Cross-sectional               | HBOC | FM=25                   | FM=38.5, 24-55                                   |                                          | Participants reported negative changes in intimacy levels, attraction and communication with their partners as well as more frequent discussions about the future.                                                                      |
| Mays et al.,<br>2014              | USA | Prospective<br>study          | HBOC | 109 dyads               | FM_Mothers:45.9 (6.1);<br>FM_partners:47.8 (6.9) | FM_Mothers:F=100%;<br>FM_Partners:M=100% | Decisional conflicts before genetic testing from one member of the couple predicted higher distress in the other member of the dyad one month after the test.                                                                           |
| McInerney-<br>Leo et al.,<br>2005 | USA | Prospective<br>study          | HBOC | 262                     | TotalMean=40                                     | Total=92(35%):170(65%)                   | Perceptions of family cohesion increased both when participants underwent testing                                                                                                                                                       |

|                           |     |                                |                                       |                 |                |        |                                                                                                                                                                                                            |
|---------------------------|-----|--------------------------------|---------------------------------------|-----------------|----------------|--------|------------------------------------------------------------------------------------------------------------------------------------------------------------------------------------------------------------|
|                           |     |                                |                                       |                 |                |        | and when they did not; Conflict decreased from baseline for those who underwent testing.                                                                                                                   |
| Mendes & Sousa, 2012      | PT  | Exploratory, qualitative study | HNPCC<br>or<br>HBOC<br><br>or<br>HDGC | 50 (9 families) | NR             | F=58%  | Cancer related events within the family impacts how carriers assess their risk; Families consider genetic counseling an emotionally taxing process.                                                        |
| Metcalfe et al., 2002     | CAN | Cross-sectional                | HBOC                                  | FM=59           | FM=50.6, 28-73 | M=100% | Twenty percent of partners considered their carrier spouse received inadequate support. Most partners felt that the syndrome brought them closer to their spouse                                           |
| Milhabet et al., 2013     | FR  | Cross-sectional                | HBOC                                  | FM=77           | FM=32.09(5.21) | F=100% | Overscreening behaviours by non-carriers were associated with feelings of self-vulnerability and pessimism related to cancer risk                                                                          |
| Mireskandari et al., 2006 | AUS | Exploratory study              | HBOC                                  | FM=15           | 41.4, 30-56    | M=100% | Better adjustment and coping for partners of women with HBOC were associated with dealing with the stressor as a team, involvement in the decision-making, satisfaction with supportive role and optimism. |

|                           |     |                                |       |                    |                                           |                           |                                                                                                                                                                                         |
|---------------------------|-----|--------------------------------|-------|--------------------|-------------------------------------------|---------------------------|-----------------------------------------------------------------------------------------------------------------------------------------------------------------------------------------|
| Mireskandari et al., 2007 | AUS | Single-assessment study design | HBOC  | 190 (MC=95; FM=95) | MC=45.4(10.2), 23-72; FM=42.9(9.4), 23-67 | 95(50%):95(50%)           | Clinical levels of distress were reported by 10% of partners of women at high risk of HBOC; Open communication within the couple associated with less partner distress.                 |
| Murakami et al., 2004     | JAP | Prospective qualitative study  | HNPCC | 47 (MC=31; FM=16)  | TotalMean=47(10), 28-60                   | Total=20(47.6%):22(52.4%) | Some carriers reported feelings of guilt either towards their children or family members affected by cancer.                                                                            |
| Norris et al., 2009       | USA | Descriptive qualitative study  | HBOC  | 17 (5 families)    | NR                                        | 6(35.3%):11(64,7%)        | Families often need more professional support than what they are getting with genetic counselling; Parents are unsure about how to share genetic information to their offspring.        |
| Patenaude et al., 2013    | USA | Observational                  | HBOC  | MC=40              | FM=21, 18-24                              | F=100%                    | Daughters presented worries about their own risk and their mothers'; Thirty two percent of participants showed clinical levels of cancer-risk distress.                                 |
| Peterson et al., 2003     | USA | Retrospective, cross-sectional | HNPCC | 39 (5 families)    | TotalMean=49.2, 21-81                     | 15(38.5%):24(61.5%)       | Spouses of carriers considered the news about the mutation as less personally relevant even when they had children at risk. Members of families with the most uptake of genetic testing |

|                           |     |                            |       |                     |                        |                  |                                                                                                                                                                                                                                    |
|---------------------------|-----|----------------------------|-------|---------------------|------------------------|------------------|------------------------------------------------------------------------------------------------------------------------------------------------------------------------------------------------------------------------------------|
|                           |     | qualitative study          |       |                     |                        |                  | worried for others that opted to not be tested                                                                                                                                                                                     |
| Puski et al., 2018        | USA | Qualitative descriptive    | HBOC  | 20                  | 20-50                  | F=100%           | Most often, family members are involved in the decision-making process by providing emotional and social support; Some family members may put too much pressure on carriers to make a decision, causing them discomfort.           |
| Shapira et al., 2017      | USA | Observational              | HBOC  | 229 (MC=168; FM=61) | TotalMean=39.7(10.1)   | NR               | Partner's perception of risk were similar to carriers. Dyadic coping scores was not related with carriers' or partners' adaptation scores                                                                                          |
| Smith et al., 1999        | USA | Longitudinal observational | HBOC  | 212                 | TotalMean=46.32(16.72) | 87(41%):125(59%) | Non-carrier men whose siblings tested positive reported more distress than when siblings tested negative; Carrier women whose siblings either tested negative or had not yet been tested presented greater psychological distress. |
| Van Oostrom et al., 2007a | NLD | Prospective study          | HNPCC | MC=271              | MC=43.25(12.7)         | 32(12%):239(88%) | Participants perceiving family functioning as maladaptive reported more hereditary cancer related distress than participants who perceived their family as adaptive.                                                               |

|                           |     |                            |       |                    |                                           |                    |                                                                                                                                                                                                  |
|---------------------------|-----|----------------------------|-------|--------------------|-------------------------------------------|--------------------|--------------------------------------------------------------------------------------------------------------------------------------------------------------------------------------------------|
| Van Oostrom et al., 2007b | NLD | Prospective study          | HNPCC | MC=272             | MC=43.25(12.7)                            | 32(12%):239(88%)   | Perceiving their family as enmeshed-chaotic or disengaged and feeling less free to talk about cancer-risk related issues predicted relationship problems with their family.                      |
| Watts et al., 2011        | UK  | Observational              | HBOC  | 188 (MC=94; FM=94) | MC=42.9(9.4), 23–67; FM=45.4(10.2), 23–72 | F=100% (FM_M=100%) | Higher perceived support associated with greater dyadic consensus and satisfaction; Dyadic cohesion and satisfaction were associated with the use of a team approach when dealing with stressors |
| Wylie et al., 2003        | USA | Longitudinal observational | HBOC  | 203                | TotalMean=45.27(13.67)                    | M=100%             | Higher anxiety from the partner predicts higher distress for the tested person, while higher support from the partner predicts lower distress for the applicant.                                 |

**Supplementary file 1: Characteristics of the included studies (continue)**

| Author, year        | MC Familiar role | FM | FM Gene Pathogenic variant Status | Follow-up points                                | Outcome:Measure                                                      | Quality |
|---------------------|------------------|----|-----------------------------------|-------------------------------------------------|----------------------------------------------------------------------|---------|
| Ashida et al., 2009 | NR               | NR | Carrier-NonCarrier                | T0: Baseline<br>T1: 6 months after disclosure – | Depression:CES-D; Family relationships:FES; Cancer worry:ad hoc tool | 5       |

|                            |                                     |                               |                    |  |                                                                                              |                                                                                                                                                                                                                   |   |
|----------------------------|-------------------------------------|-------------------------------|--------------------|--|----------------------------------------------------------------------------------------------|-------------------------------------------------------------------------------------------------------------------------------------------------------------------------------------------------------------------|---|
|                            |                                     |                               |                    |  | T2: 12 months after disclosure                                                               |                                                                                                                                                                                                                   |   |
| Bartle-Haring et al., 2003 | Siblings, spouses, or son/daughter  | Siblings, spouses, or parents | Carrier            |  | T1: baseline – T2: at disclosure                                                             | Distress:IES; Depression and anxiety:HSCL; Differentiation of Self:DSI                                                                                                                                            | 4 |
| den Heijer et al., 2011    | Daughter, partner, mother, friend   | NR                            | Carrier            |  | T0: baseline – T1: 2 months                                                                  | Distress:IES; Depression and anxiety:HADS; Social support:MSPSS                                                                                                                                                   | 5 |
| Di Prospero et al., 2001   | Parents, partner                    | Partner, sons                 | NonCarrier         |  | NR                                                                                           | Cancer risk perception; worry about cancer; attitudes toward surveillance and prevention options; satisfaction with clinical services; additional support - satisfaction of having taken genetic test:ad hoc tool | 4 |
| Douma et al., 2011         | Partner                             | Partner                       | NonCarrier         |  | NR                                                                                           | Cancer Worry: CWS, Intrusion: IES-Intrusion subscale, and Quality of Life: SF36 Health Survey                                                                                                                     | 5 |
| Eliezer et al., 2014       | Partner, son, parent, cousin, uncle | Internal and external family  | Carrier-NonCarrier |  | T0: baseline (genetic test) – T1: 6 months (test results delivered 1-2 months from baseline) | Distress:IES; Cancer worry and Depression:ad hoc tool                                                                                                                                                             | 4 |
| Hamann et al., 2008        | Sibling                             | Sibling                       | Carrier-NonCarrier |  | NR                                                                                           | Circumplex measures:SAS-C, IMI-C; Anger and anxiety:STAI                                                                                                                                                          | 5 |
| Koehly et al., 2008        | Sister                              | Sister                        | Carrier-NonCarrier |  | NR                                                                                           | Distress:BSI; Cancer worry:LCWS; Cancer risk perception:PRI; Social integration, reciprocity and shared support:ad hoc tool                                                                                       | 5 |
| Lodder et al., 2001        | Partner                             | Partner                       | NonCarrier         |  | T0: pre-test – T1: post-test                                                                 | Depression and anxiety:HADS; Distress:IES                                                                                                                                                                         | 4 |
| Manne et al., 2004         | Partner                             | Partner                       | NonCarrier         |  | T0: pre-test – T1: 6 months after disclosure                                                 | Partner Response to Cancer:PRCI; Distress:IES; Depression and anxiety:BSI-Anxiety and Depression subscales; Partner support; Relationship strain; Sharing of concerns:ad hoc tool                                 | 4 |
| Mauer et al., 2015         | Partner                             | Partner                       | NonCarrier         |  | NR                                                                                           | Male attitudes towards partnership and sexuality:ad hoc tool                                                                                                                                                      | 4 |



|                            |                   |                   |                                  |                                                                               |                                                                                                                                                                                                                                                                                            |   |
|----------------------------|-------------------|-------------------|----------------------------------|-------------------------------------------------------------------------------|--------------------------------------------------------------------------------------------------------------------------------------------------------------------------------------------------------------------------------------------------------------------------------------------|---|
| Mays et al., 2014          | Mothers           | Partner           | Carrier-NonCarrier               | T0: baseline –<br>T1: 1 month after disclosure                                | Distress:BSI; Parent-Adolescent Communication:PAC; Decisional conflict:DCS.                                                                                                                                                                                                                | 5 |
| McInerney-Leo et al., 2005 | NR                | NR                | NonCarrier                       | T0: baseline –<br>T1: 6 months –<br>T2: 9 months                              | Family Relationship Index:FRI; Family Environment:FES                                                                                                                                                                                                                                      | 4 |
| Mendes & Sousa, 2012       | NR                | NR                | Carrier-NonCarrier               | NR                                                                            | Familial experience of genetic counseling and meaning, impacts and management of the genetic condition: ad hoc semi-structured interview; The personal relevance of the family interview: post-interview questionnaire, ad hoc tool                                                        |   |
| Metcalf et al., 2002       | Partner           | Partner           | NonCarrier                       | NR                                                                            | NR                                                                                                                                                                                                                                                                                         | 5 |
| Milhabet et al., 2013      | NR                | NR                | NonCarrier                       | NR                                                                            | Screening behaviors: ad hoc tool; State anxiety: STAI-YA; Feelings of self-vulnerability or self-risk perception: ad hoc tool; Comparative perception of risk or comparative optimism                                                                                                      |   |
| Mireskandari et al., 2006  | Partner           | Partner           | NonCarrier                       | NR                                                                            | NR                                                                                                                                                                                                                                                                                         | 5 |
| Mireskandari et al., 2007  | Partner           | Partner           | NonCarrier                       | NR                                                                            | Monitoring attentional style:MBSS; Distress, Depression and anxiety:DASS and IES; Information and support needs; Knowledge about breast/ovarian cancer; Individual and couple factors; Cancer–related event in the family:ad hoc tool.                                                     | 5 |
| Murakami et al., 2003      | NR                | NR                | NonCarrier                       | T0: pre-test –<br>T1: administration genetic test –<br>T2: 1 month after test | Depression:SCID; Personality factors:EPQR; Feelings of guilt:ad hoc tool                                                                                                                                                                                                                   | 5 |
| Norris et al., 2009        | Mothers and wives | Sons and husbands | NonCarrier                       | NR                                                                            | Communication and decision-making strategies:ad hoc Semi-structured Interview                                                                                                                                                                                                              | 5 |
| Katapodi et al., 2011      | NR                | NR                | Relatives did not pursue testing | NR                                                                            | Illness appraisals of HBOC: Breast/Ovarian cancer risk factor knowledge index; IPQ-R; ad hoc tool; Psychological distress: ad hoc tool; Family environment: Family problem solving and communication index; Family relationships inventory; Decisional Conflict: Decisional conflict scale |   |

|                           |         |               |                    |                                                                                                  |                                                                                                                                                                                                            |   |
|---------------------------|---------|---------------|--------------------|--------------------------------------------------------------------------------------------------|------------------------------------------------------------------------------------------------------------------------------------------------------------------------------------------------------------|---|
| Patenaude et al., 2013    | Mothers | Daughters     | Carrier-NonCarrier | NR                                                                                               | General distress: BSI-18; Cancer related distress: IES; Breast Cancer Genetic Counselling Knowledge: BCKQ                                                                                                  | 5 |
| Peterson et al., 2003     | NR      | NR            | Carrier-NonCarrier | NR                                                                                               | Personal perceptions and persuasion in motivating:ad hoc Semi-structured Interview                                                                                                                         | 5 |
| Puski et al., 2018        | NR      | Not specified | Carrier            | NR                                                                                               | Decision-making:ad hoc Semi-structured Interview                                                                                                                                                           | 5 |
| Shapira et al., 2017      | Partner | Partner       | NonCarrier         | NR                                                                                               | Psychological adaptation:PAS; Dyadic coping:DCI; Risk perception:ad hoc tool;                                                                                                                              | 5 |
| Smith et al., 1999        | Sibling | Siblings      | Carrier            | T0: baseline, before genetic testing –<br>T1: 1/2 weeks after receiving results                  | Distress:IES, STAI                                                                                                                                                                                         | 5 |
| Van Oostrom et al., 2007a | NR      | NR            | Carrier-NonCarrier | T0: baseline –<br>T1: 1 week –<br>T2: 6 months after disclosure                                  | Distress:IES; Anxiety and Depression:HADS; Nuclear family functioning:FACES; Differentiation to parents:DFSC; Familial communication style:ODHCFS; Perceived social support:ad hoc tool; Cancer worry:CWS. | 5 |
| Van Oostrom et al., 2007b | NR      | NR            | Carrier-NonCarrier | T0: baseline –<br>T1: 1 week –<br>T2: 6 months after disclosure                                  | Distress:IES; Anxiety and Depression:HADS; Nuclear family functioning:FACES; Differentiation to parents:DFSC; Familial communication style:ODHCFS; Perceived social support:ad hoc tool; Cancer worry:CWS. | 5 |
| Watts et al., 2011        | Partner | Partner       | NonCarrier         | NR                                                                                               | Distress:DASS, IES; Dyadic adjustment:DAS; Support and team approach:ad hoc tool.                                                                                                                          | 5 |
| Wylie et al., 2003        | Partner | Partner       | Carrier-NonCarrier | T0: baseline –<br>T1: 1 week –<br>T2: 4 months –<br>T3: 1 year –<br>T4: 2 years after disclosure | Distress:IES; Spousal anxiety/distress; Family cancer history; Carrier status:ad hoc tool                                                                                                                  | 5 |

*Legend:* NR = Not reported | AUS = Australia; CAN = Canada; JAP = Japan; NLD = The Nederland; UK = The United Kingdom; USA = The United states of America; PT = Portugal | GT = Genetic test; HNPCC = Hereditary nonpolyposis colorectal cancer; HBOC = Hereditary breast and ovarian cancer syndrome | FM = family member; MC =

pathogenic variant carrier | RMB = Risk management behaviours | BSI = Brief Symptom Inventory; CES-D = Center for Epidemiology Studies; CWS = Cancer Worry Scale; DAS = Dyadic Adjustment Scale; DASS = Depression, Anxiety, and Stress Scale; DCI = Dyadic Coping Inventory; : DCS = Decision Conflict Scale DFSS = Differentiation in the Family System Scale; DFSC = Decision Conflict Scale; DSI = Differentiation of Self Inventory; EPQ-R = Eysenck Personality Questionnaire; FACES = Family Adaptability and Cohesion Evaluation Scales; FES = Family Environment Scale; FRI = Family Relationship Index; HADS = Hospital Anxiety and Depression Scale; MSPSS = Multidimensional Scale of Perceived Social Support; HSCL = Hopkins Symptom Checklist; IES = Impact of Events Scale; IMI-C = Impact Message Inventory—Circumplex; LCWS = Lerman Cancer Worry Scale; MBSS = Miller Behavioural Style Scale; NEO-FFI = NEO-Five Factor Inventory; ODHCFs = Openness to Discuss; HCFS = Hereditary Cancer in the Family Scale; PAC = Parent-Adolescent Communication; PAS = Psychological Adaptation Scale; PRCI = Partner Response to Cancer Inventory; SAS-C = Support Actions Scale-Circumplex; STAI = Stait-Trait Personality Inventory; SCID = Structured Clinical Interview | 5 = 100% quality criteria met; 4 = 80% quality criteria met.
